# Supplementary material for: Combined chemo-immuno-photothermal therapy based on ursolic acid/astragaloside IV-loaded hyaluronic acid-modified polydopamine nanomedicine inhibiting the growth and metastasis of non-small cell lung cancer
Source: Royal Society of Chemistry journal article supplement (doi:10.1039/d2tb02328h), 2023-01-01
Supplement: d2tb02328h1.pdf [file d2tb02328h1.pdf]

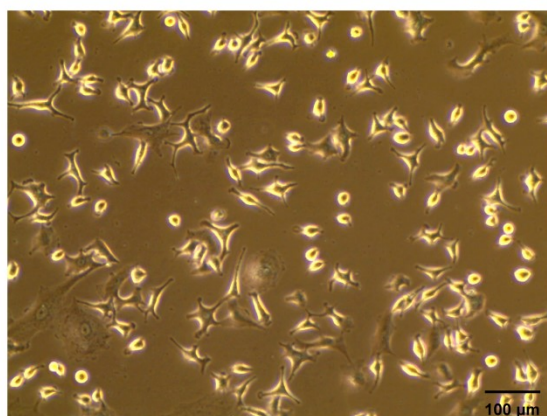

**Figure S1.** The lung circulating tumor cell line CTC-TJH-01 used in this study was collected from the female patients' peripheral blood with stage IIa lung adenocarcinoma.

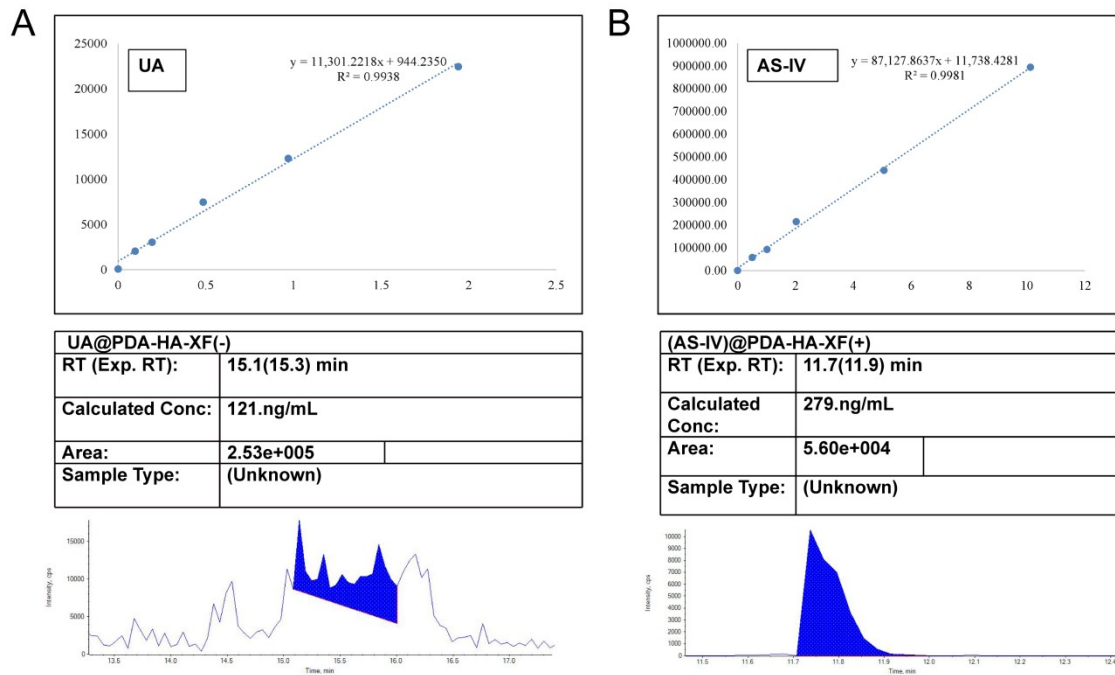

**Figure S2.** Quantification of the encapsulation rate of nanomedicines using liquid chromatograph mass spectrometer (LC-MS).

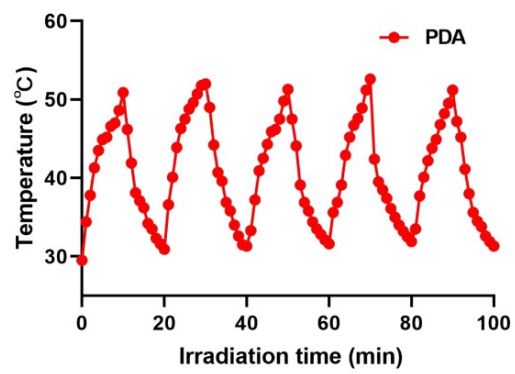

**Figure S3.** Temperature change curves of PDA ( 0.6 mg/mL ) over five cycles of laser on/off under 808 nm laser irradiation (1 W/cm<sup>2</sup>).

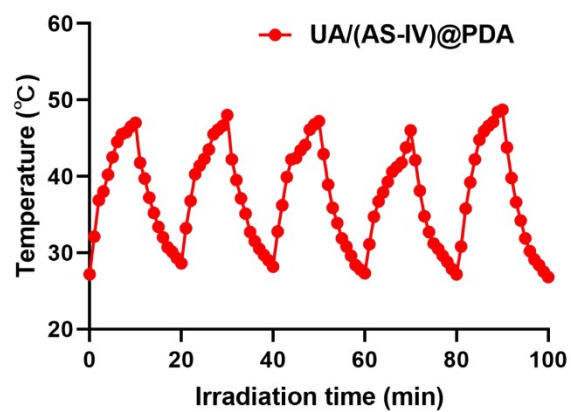

**Figure S4.** Temperature change curves of UA/(AS-IV)@PDA ( 0.6 mg/mL ) over five cycles of laser on/off under 808 nm laser irradiation (1 W/cm<sup>2</sup>).

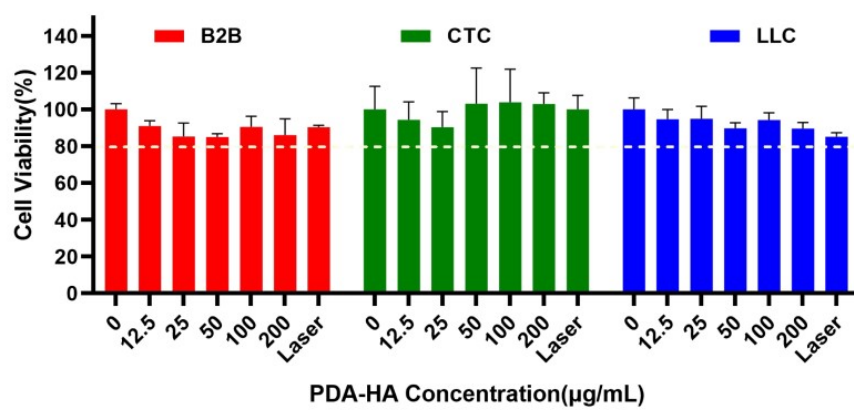

**Figure S5.** In vitro biocompatibility of the blank HA-modified PDA NPs (PDA-HA) and cell damage of 808 nm laser irradiation.
